# Supplementary material for: Molecular Characterization of the BMP7 Gene and Its Potential Role in Shell Formation in Pinctada martensii
Source: MDPI journal article supplement (doi:10.3390/ijms151121215), 2014-11-17
Supplement: s1 [file s1]

# Supplementary Information

**Figure S1.** The unigene and deduced protein sequence of Pm-BMPRI and Pm-BMPRII.

BMPRI

```
1 ggtgcttgcgcataatttccaaaaaaatagtaaacacaacatcacgctaacaaggcaaagaaaagtaccatttataaaaagattgctgttt
91 agtgaataactgataatcattgatattcgattatccattgcagcgaggagaaaagtgcacgtatgaaatggctgtcgagccatttccggactg
1 M M V I A S F V Y L
181 ctgtttacgacgtgaaataagaatcaatcatttgaagaactggcctgaattcttcttggaaaATGATGGTCATTGCCTCTTTTGTGTATCT
11 L V Q L G G G L S T E G A L M S P P L R C A I F L E E C E E
271 CCTTGTTGAGCTAGGAGGGGGTTGTCAACTGAGGGAGCCCTGATGTCGCCTCCCTTACGCTGTGCTATCTTCCCTTGAGGAGTGTGAGGA
41 K G R S C V V Y D Y C D K G Y T H C F T A W K Q G N T T K G
361 GAAAGGGAGATCCTGTGTTGTCTATGATTACTGTGATAAAGGTTACACACACTGTTTTACTGCCTGGAACAGGGAAACACTACTAAAGG
71 I E L I K Q G C W T H Q E M C E S D E C V Q T S N A H K K I
451 TATAGAGCTTATCAAGCAGGGATGCTGGACCCATCAGGAGATGTGTGAATCCGATGAATGTGTACAAACATCTAACGCACACAAAAAAAT
101 N F C C C R K D L C N V N I T A V E F A D S T T K K P S T V
541 CAACTTTTGTGCTGTCCGAAAGACCTCTGTAATGTCAATATTACTGCTGTGGAATTCGCAGATTCAACAACATAAAAAACCTCAACAGT
131 G N P I Q A L P S E D P V A K T L M V T L V P I S A V V I F
631 AGGAAACCTTATACAGGCCCTGCCTTACAGGACCTGTAGCAAAGACCTTGATGGTAACACTGGTGGCCATTCTGTGCTGGTCATTTT
161 I V V G F F L F R Y L R K E G R Y M A H Q Q L P I L D P E L
721 TATTGTCGTAGGATTTTTCTTGTTCAGATATCTACGGAAGGAAGGAGGTATATGGCCACCAACAGTTACCTATACTGGATCCAGAGTT
191 S M P E S L L P H K P I Q L L E I R A H G R F G E V W K A K
811 ATCTATGCCAGAGTCACTCCTTCCCATAAACCAATACAGTTACTTGAATCAGAGCTCATGGCAGGTTTGGAGAAGTATGGAAGGCAAA
221 M E E H D V A V K I M P F K E K A S W L A E Q E I Y N L P H
901 GATGGAGAACATGATGTTGCCGTTAAGATAATGCCGTTCAAAGAGAAAAGCGTCATGGCTGGCTGAACAGGAGATTTACAACCTGCCGA
251 M A H D N I L L F V G A E K H E E N L W L I T Q F H E K G S
991 TATGGCCACGACAAACATTCTGTTATTTGTTGGAGCGGAGAAAACACAGGAAAACCTATGGTTGATCACCCAGTCCACGAGAAAAGGTC
281 L C E Y L K G N T I T W S Q L C K M A E T M S R G L A Y L H
1081 TTTGTGTAATATTTGAAAGGGAATACCATAACATGGAGCCAGCTATGTAATAATGGCTGAAACAATGTCCAGGGGTTTGGCATACTTACA
311 D E I P G G R G T E A K P A I A H R D F K S K N V L L K D D
1171 CGATGAAATTCCTGGGGTTCGGGGTACCGAGGCTAAGCCAGCTATAGCCCATCGAGACTTTAAGAGTAAGAACGTCCTTATTGAAAGATGA
341 L S A C I A D F G L A L K F E P G K S P G E T H G L V G T R
1261 CCTCAGTGCATGTATAGCCGACTTTGACTCGCTCTGAAGTTTGAACCGGGTAAAAGTCCAGGAGAGACTCATGGGCTGGTCGGAACAAG
371 R Y M A P E I L E G A I S F K R D A F L R I D M Y A C G L V
1351 GAGATACATGGCACCGGAAATCCTAGAGGGCGCTATCAGTTTAAAGCGTATGCTTTTCTGCGTATTGACATGTACGCTTGGCGCTTGGT
401 L W E L C G S W
1441 ATTGTGGAGTTGTGTGGGAGTTGGtgacacgatgttcgtgcttgacgggccgattgacgagatcagctaccatttgaggaggaagtc
1531 ggctctcaccggacactggaggatttacaagacttagtctgtgatgaagaaagtacgaccctccataaaaggaacactggcagagacatgct
1621 ggtttgatgctgctgatatctactatagaagaatgctgggatcaagatgctggaggctcgtgtatctgcccgtgtgtgtaacgaacgaatg
1711 aaccaattaacgctacgttaaacgtgtcctaactctcagaaaaatgtgactgtaacatcaaatcaaggagactactatataaactctgtg
1801 tcaacgtaaacctatgaaaggagccgtgtcaagggcaataaactcctc
```

BMPRII

```
1 E R L T P D A G W K F F I I L S Y A S K G N L Q E Y L R N N
1 GAGAGATTGACTCCAGACGCAGGCTGGAAATTTTTATAATTTTGTGCTATGCGTCTAAAGGGAATTTGCAGGAGTATTTGAGGAACAAC
31 T L E W S I F C R M C L G T I R G L I H L H T D I R K G D K
91 ACCTAGAATGGAGCATATTTTGTGCTATGTGCTAGGAACTATTAGAGGTCTTATACATCTACATACAGATATCAGGAAGGGAGACAAG
61 F K P T V A H R D L N T R N I L V R D D L S C V I G D L G F
181 TTTAAGCCTACCGTTGCCATAGAGATTTAAATACCAGAAAACATCCTTGTACGAGATGATTTGTGCTGTGTGATAGGTGACTTGGGATTC
91 A I T T M G S K L I K N G
271 GCCATTACAACATATGGGATCCAAACTGATCAAAAACGGC
```
